# Supplementary material
Source: MDPI journal article supplement (https://www.mdpi.com/1999-4907/14/5/928)
Supplement: s1 [file s1 › forests-2284830-Supplementary Materials.pdf]

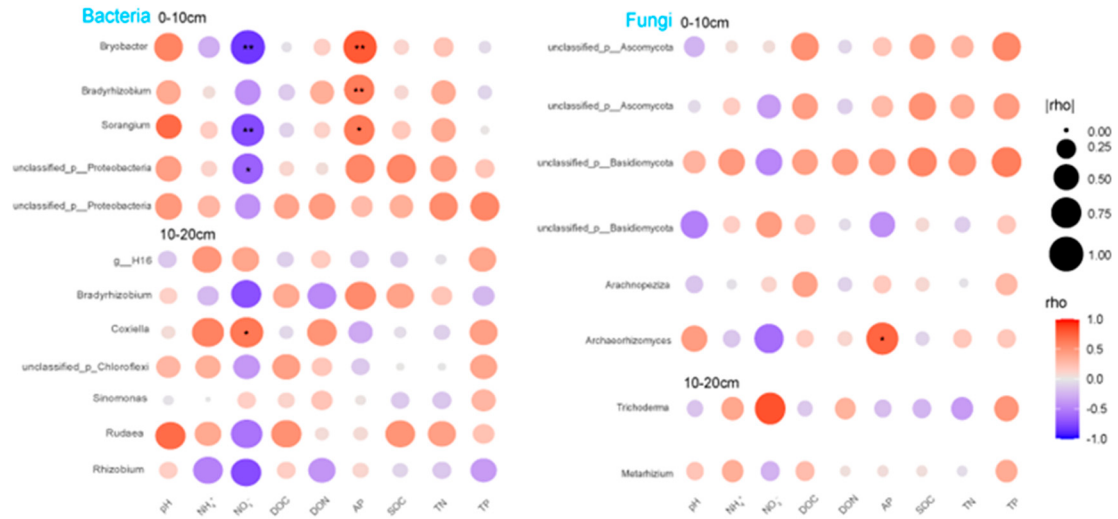

**Figure S1.** Correlations between soil properties and microorganisms differing at the genus level. \* indicates that the association between indicators reached the level of significance ( $p < 0.05$ ). \*\* indicates that the association between indicators reached a highly significant level ( $p < 0.01$ ).
